# Supplementary material for: Up-regulation of CIT promotes the growth of colon cancer cells
Source: PubMed Central journal article supplement (PMC5641103; doi:10.18632/oncotarget.18615), 2017-06-27
Supplement: oncotarget-08-71954-s001.pdf [file oncotarget-08-71954-s001.pdf]

# Up-regulation of CIT promotes the growth of colon cancer cells

## SUPPLEMENTARY MATERIALS

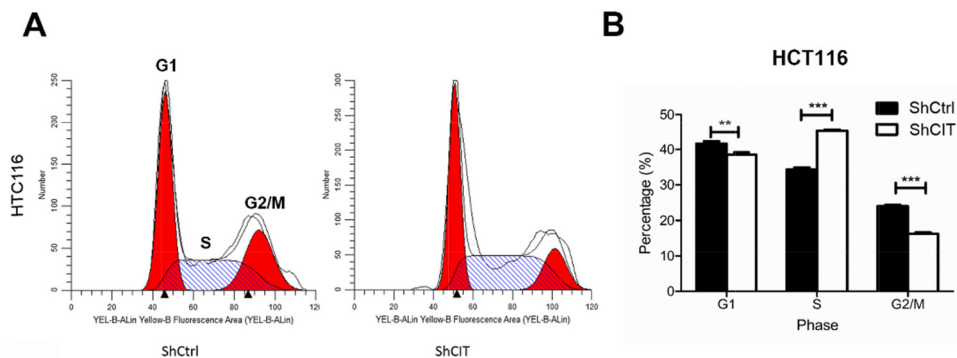

**Supplementary Figure 1: (A-B)** Flow cytometry analysis of cell cycle reveals that CIT knockdown induces HCT116 cell cycle arrested at S phase. \*\*\* $P < 0.001$  vs. sh-Ctrl.

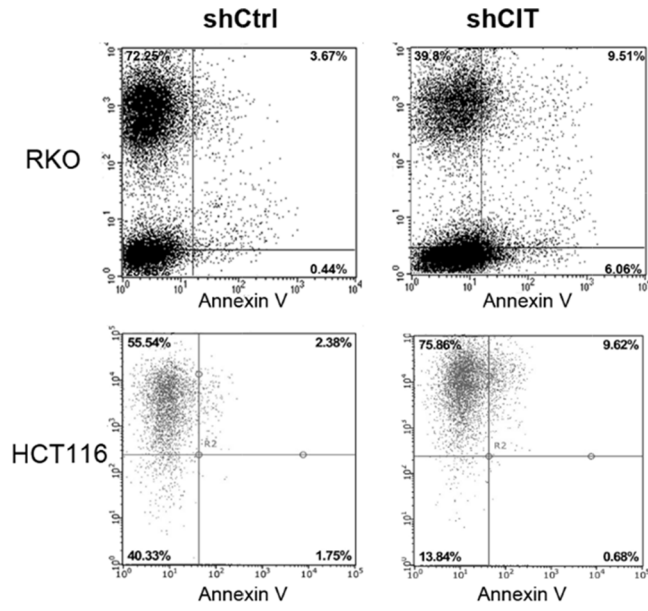

Supplementary Figure 2: This figure showed the dot plots and gating strategy of FACS analyses for Figure 5C & 5E.
